# Supplementary material for: In situ polymerization of supramolecular nanorods assembled from polymerizable perylene bisimide
Source: Royal Society of Chemistry journal article supplement (doi:10.1039/c7py00895c), 2017-01-01
Supplement: c7py00895c1.pdf [file c7py00895c1.pdf]

**Supporting information for manuscript entitled with**

**In-situ Polymerization of Supramolecular Nanorods  
Assembled from Polymerizable Perylene Bisimide**

*Yan Sun,<sup>ab</sup> Zhibo Li<sup>b\*</sup>*

<sup>a.</sup> *College of Chemistry and Chemical Engineering, Yangzhou University, Yangzhou 225002, China.*

<sup>b.</sup> *School of Polymer Science and Engineering, Qingdao University of Science and Technology, Qingdao 266042, China.*

† E-mail: zbli@qust.edu.cn.

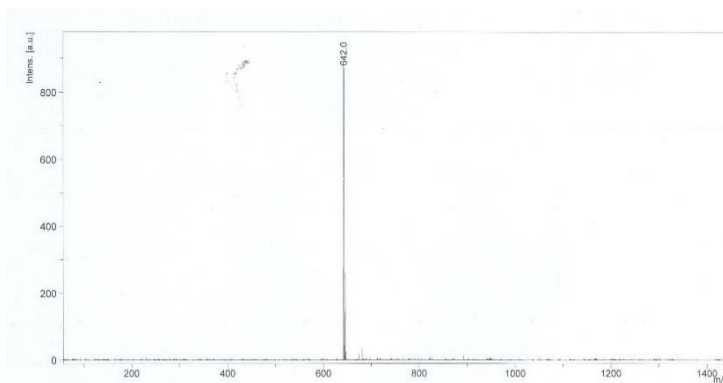

**Figure S1.** MALDI-TOF spectrum of P4-C.

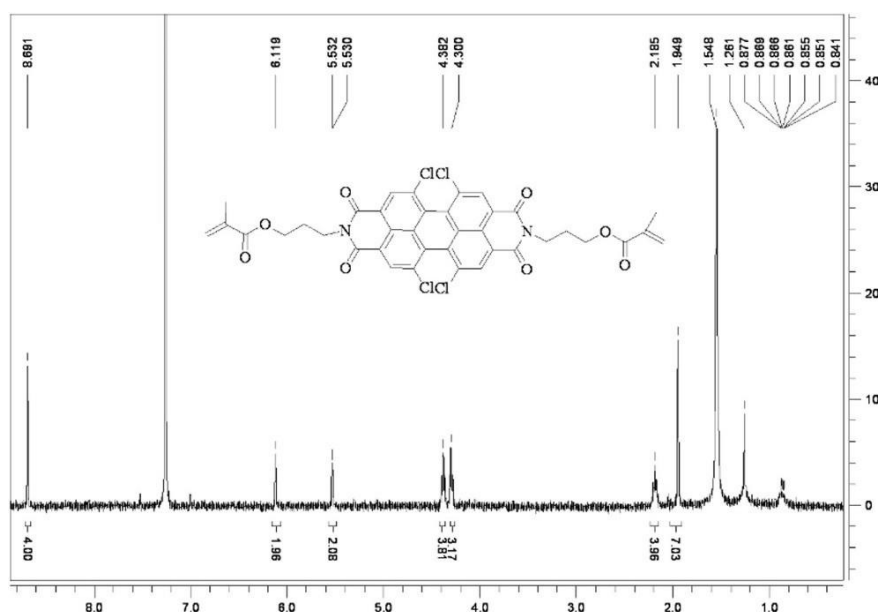

**Figure S2.**  $^1\text{H}$ -NMR spectra of P4-M. (The chemical shifts below 1.5 ppm is attributed to the water and hexane in  $\text{CDCl}_3$ )

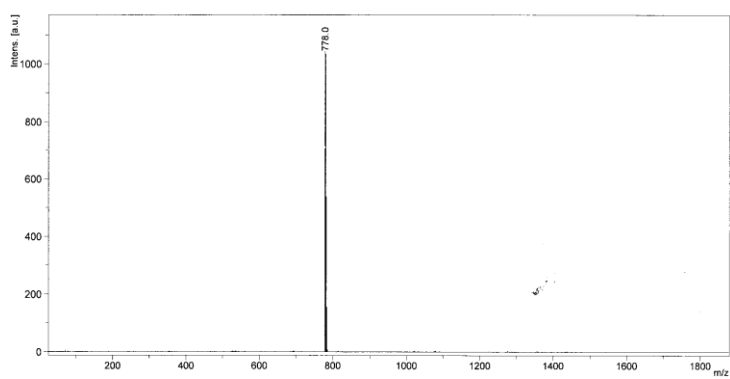

**Figure S3.** MALDI-TOF spectrum of P4-M.

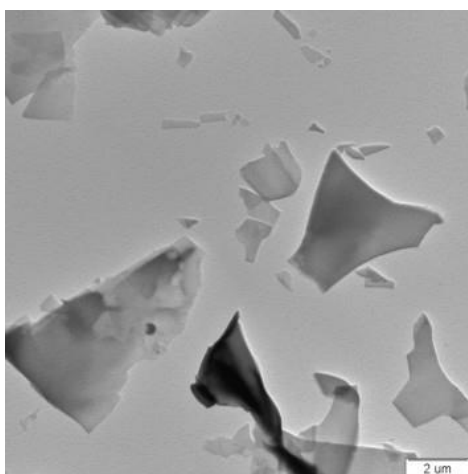

**Figure S4.** Hierarchical structure was destroyed by the addition of THF.

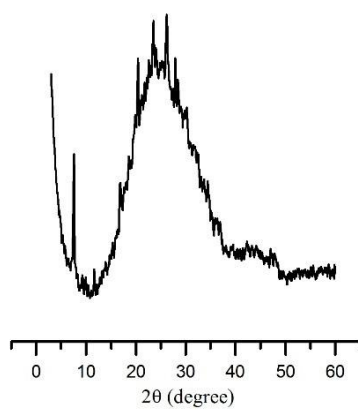

**Figure S5.** XRD profile of the polymerized nanorods.

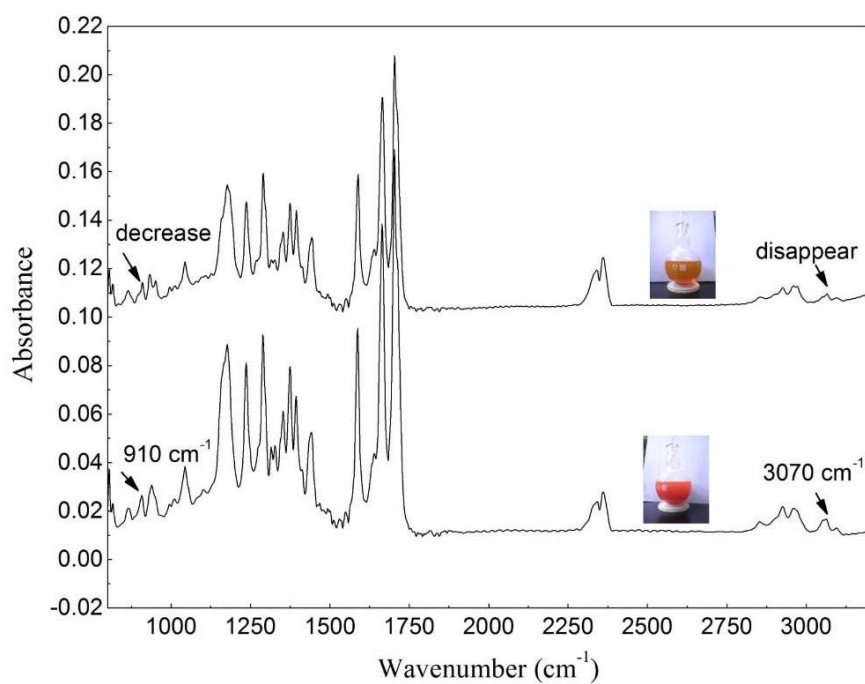

**Figure S6** FT-IR spectra of the P4-M (a) before and (b) after polymerization.

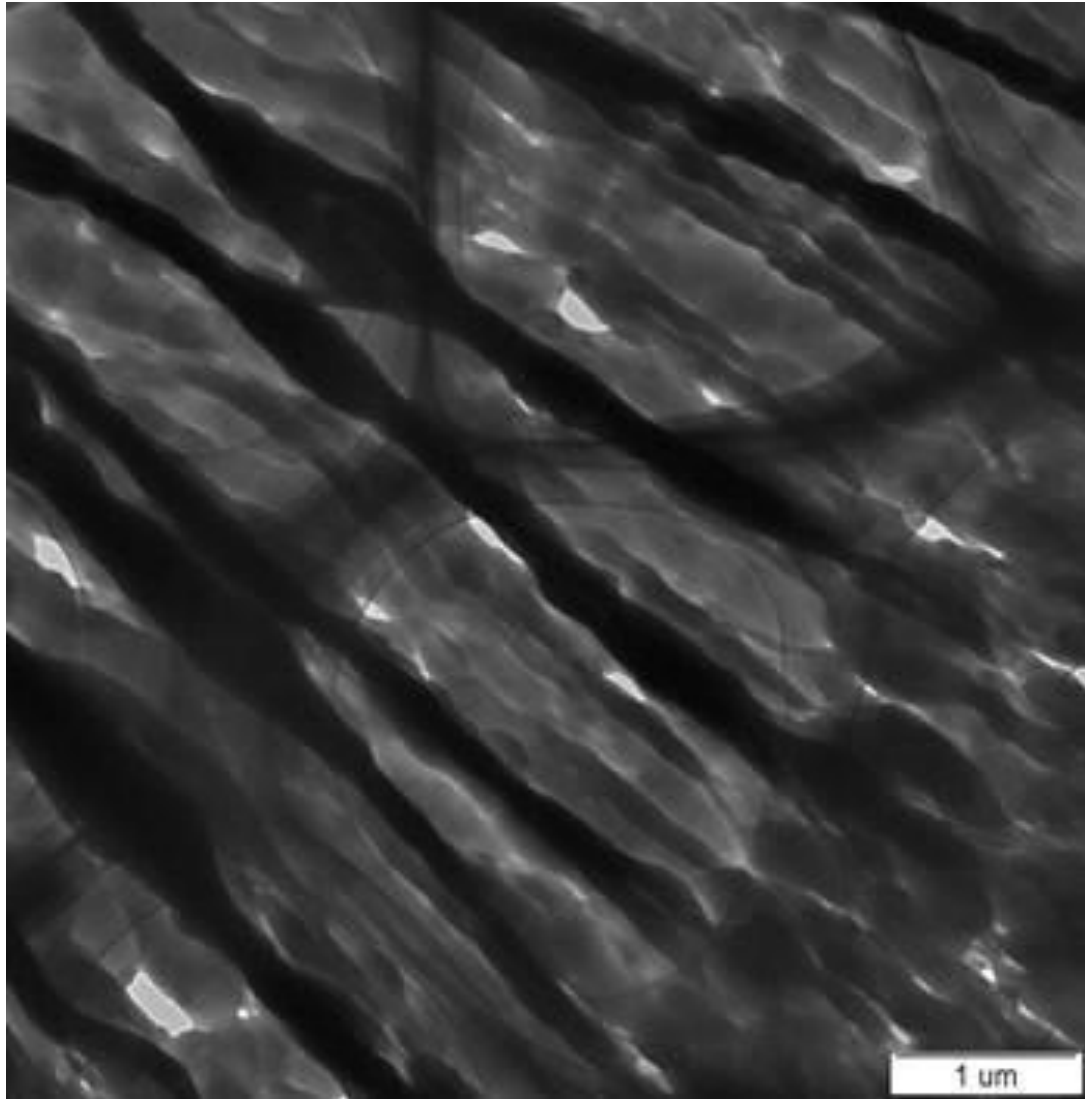

**Figure S7.** TEM image of the cross section at higher amplification.
